# Supplementary material
Source: PubMed Central journal article supplement (PMC4300621)
Supplement: JVI.02889-14_zjv999099935so3.pdf [file JVI.02889-14_zjv999099935so3.pdf]

1 **SUPPLEMENTAL MATERIALS**

2

3 **MOVIE LEGENDS**

4

5 Movie 1: Intracellular Capsid Motility of AdV5 Wild Type.

6 A549 cells were infected with Alexa-labeled AdV5 wild type (WT) capsids at an MOI of 20 and imaged  
7 at 16.5fps for 1 min at 34min p.i. AdV5 WT capsids move over long distances ( $>1 \mu\text{m}$ ) in 82.7% of  
8 examined cells. Movie is 6fold time-compressed, every 10th frame of the original movie is shown.  
9 Movie corresponds to figure 6E.

10

11 Movie 2: Intracellular Capsid Motility of AdV5 HVR1 Mutant.

12 A549 cells were infected with Alexa-labeled AdV5HVR48(1) capsids at an MOI of 20 and imaged at  
13 16.5fps for 1 min at 25min p.i. AdV5HVR48(1) capsids move over long distances ( $>1 \mu\text{m}$ ) in 27.1% of  
14 examined cells. Movie is 6fold time-compressed, every 10th frame of the original movie is shown.  
15 Movie corresponds to figure 6E.

16
